# Supplementary material
Source: publisher figshare collection journal article supplement (https://frontiersin.figshare.com/ndownloader/files/20133872)
Supplement: Supplementary file [file 20133872]

### Supplementary Equation S1

For the concurrent association models, this was the general equation:

$$Y_{ij}^{t1} = \beta_0 + b_i + \beta_1 X_{ij}^{t1} + \dots + \varepsilon_{ij}$$

There are j family members for i families.  $b_i$  is the random effect with  $b_i$  i. i. d.  $\sim N(0, \sigma_b^2)$ , allowing a different intercept for every family. In these models, the superscript t1 indicates that only observations of time 1 are included in the analyses.  $\varepsilon_{ij}$  is the within-family error component with  $\varepsilon_{ij}$  i. i. d.  $\sim N(0, \sigma_e^2)$ .

### Supplementary Equation S2

For the prospective association models, this was the general equation:

$$Y_{ij}^{t2} = \beta_0 + b_i + \beta_1 X_{ij}^{t1} + \beta_2 Y_{ij}^{t1} + \dots + \varepsilon_{ij}$$

There are j family members for i families.  $b_i$  is the random effect with  $b_i$  i. i. d.  $\sim N(0, \sigma_b^2)$ , allowing a different intercept for every family. In these models, the outcome is taken at time 2 (superscript t2), while the predictors are taken at time 1 (superscript t1). The outcome at the previous time-point was included as a predictor in the model ( $Y_{ij}^{t1}$ ).  $\varepsilon_{ij}$  is the within-family error component with  $\varepsilon_{ij}$  i. i. d.  $\sim N(0, \sigma_e^2)$ .

**Table S1.** Models fit for the prospective analyses of the dependent variable General family impact.

|                                                            | Block 1:<br>Control for initial status                                          | Block 2<br>Adding variables of interest                                         |
|------------------------------------------------------------|---------------------------------------------------------------------------------|---------------------------------------------------------------------------------|
| Predictor                                                  | General family impact T2<br>(N = 111, 74 families)<br><i>Coefficient B [CI]</i> | General family impact T2<br>(N = 111, 74 families)<br><i>Coefficient B [CI]</i> |
| <b>Variables of interest</b>                               |                                                                                 |                                                                                 |
| Psychological flexibility T1                               | -                                                                               | -.16 [-.26, -.06]**                                                             |
| Stress communication T1                                    | -                                                                               | .03 [-.40, .46]                                                                 |
| Supportive DC T1                                           | -                                                                               | .04 [-.30, .38]                                                                 |
| Common DC T1                                               | -                                                                               | .24 [-.23, .71]                                                                 |
| Negative DC T1                                             | -                                                                               | -.04 [-.43, .34]                                                                |
| Total network support T1                                   | -                                                                               | -.07 [-.23, .08]                                                                |
| Satisfaction with network support (too few vs. enough) T1  | -                                                                               | .94 [-1.27, 3.15]                                                               |
| Satisfaction with network support (too much vs. enough) T1 | -                                                                               | .43 [-1.83, 2.69]                                                               |
| <b>Covariates</b>                                          |                                                                                 |                                                                                 |
| Time since diagnosis                                       | -.07 [-.14, .006]                                                               | -.07 [-.14, -.003]*                                                             |
| Age ill child                                              | -.09 [-.33, .16]                                                                | -.07 [-.32, .18]                                                                |
| Diagnosis (AML vs. ALL)                                    | .74 [-2.08, 3.55]                                                               | .80 [-2.02, 3.64]                                                               |
| Diagnosis (CML vs. ALL)                                    | -3.78 [-11.27, 3.71]                                                            | -4.96 [-12.50, 2.58]                                                            |
| Diagnosis (Non Hodgkin vs. ALL)                            | .40 [-2.17, 2.98]                                                               | .30 [-2.27, 2.87]                                                               |
| Sex parent (women vs. men)                                 | .91 [-.35, 2.17]                                                                | .55 [-.91, 2.01]                                                                |
| Age parent                                                 | .002 [-.17, .17]                                                                | -.01 [-.19, .16]                                                                |
| Family status (Divorced vs. Married)                       | 2.69 [-.84, 6.21]                                                               | 2.47 [-1.19, 6.12]                                                              |
| T2 minus T1                                                | -.07 [-.14, .005]                                                               | -.06 [-.14, .01]                                                                |
| <b>Outcome variables at previous time</b>                  |                                                                                 |                                                                                 |
| Financial impact T1                                        | -                                                                               | -                                                                               |
| General family impact T1                                   | .52 [.33, .70]***                                                               | .38 [.17, .59]***                                                               |
| Social impact T1                                           | -                                                                               | -                                                                               |
| Satisfaction with internal family fit T1                   | -                                                                               | -                                                                               |
| <b>Δ Deviance<sup>1</sup></b>                              | 29.06***                                                                        | 15.61*                                                                          |

To note: ALL = Acute lymphoblastic leukemia, AML = Acute myeloid leukemia, CML = Chronic myeloid leukemia; <sup>1</sup>For the control model (block 1), the deviance is relative to the model with only covariates. For the prediction model (block 2), the deviance is relative to the control model; \* p < .05, \*\* p < .01, \*\*\* p < .001

**Table S2.** Models fit for the prospective analyses of the dependent variable Financial impact.

|                                                            | Block 1<br>Control for initial status                                      | Block 2<br>Adding variables of interest                                    |
|------------------------------------------------------------|----------------------------------------------------------------------------|----------------------------------------------------------------------------|
| Predictor                                                  | Financial impact T2<br>(N = 111, 74 families)<br><i>Coefficient B [CI]</i> | Financial impact T2<br>(N = 111, 74 families)<br><i>Coefficient B [CI]</i> |
| <b>Variables of interest</b>                               |                                                                            |                                                                            |
| Psychological flexibility T1                               | -                                                                          | -.08 [-.13, -.03]**                                                        |
| Stress communication T1                                    | -                                                                          | -.26 [-.46, -.05]*                                                         |
| Supportive DC T1                                           | -                                                                          | .16 [-.02, .33]                                                            |
| Common DC T1                                               | -                                                                          | .11 [-.12, .35]                                                            |
| Negative DC T1                                             | -                                                                          | -.04 [-.23, .16]                                                           |
| Total network support T1                                   | -                                                                          | -.03 [-.10, .04]                                                           |
| Satisfaction with network support (too few vs. enough) T1  | -                                                                          | .25 [-.78, 1.29]                                                           |
| Satisfaction with network support (too much vs. enough) T1 | -                                                                          | .44 [-.61, 1.49]                                                           |
| <b>Covariates</b>                                          |                                                                            |                                                                            |
| Time since diagnosis                                       | -.004 [-.04, .03]                                                          | -.007 [-.04, .02]                                                          |
| Age ill child                                              | .02 [-.09, .13]                                                            | .01 [-.10, .12]                                                            |
| Diagnosis (AML vs. ALL)                                    | .16 [-1.09, 1.41]                                                          | .16 [-1.02, 1.33]                                                          |
| Diagnosis (CML vs. ALL)                                    | -2.80 [-6.04, .44]                                                         | -3.82 [-6.86, -.79]*                                                       |
| Diagnosis (Non Hodgkin vs. ALL)                            | -.58 [-1.73, .57]                                                          | -.52 [-1.58, .55]                                                          |
| Sex parent (women vs. men)                                 | -.02 [-.72, .68]                                                           | .07 [-.73, .88]                                                            |
| Age parent                                                 | .02 [-.06, .10]                                                            | .03 [-.05, .11]                                                            |
| Family status (Divorced vs. Married)                       | .31 [-1.36, 1.97]                                                          | .91 [-.70, 2.51]                                                           |
| T2 minus T1                                                | -.002 [-.04, .04]                                                          | -.01 [-.05, .03]                                                           |
| <b>Outcome variables at previous time</b>                  |                                                                            |                                                                            |
| Financial impact T1                                        | .62 [.43, .80]***                                                          | .57 [.39, .75]***                                                          |
| General family impact T1                                   | -                                                                          | -                                                                          |
| Social impact T1                                           | -                                                                          | -                                                                          |
| Satisfaction with internal family fit T1                   | -                                                                          | -                                                                          |
| <b>Δ Deviance<sup>1</sup></b>                              | 39.25***                                                                   | 24.83**                                                                    |

To note: ALL = Acute lymphoblastic leukemia, AML = Acute myeloid leukemia, CML = Chronic myeloid leukemia; <sup>1</sup>For the control model (block 1), the deviance is relative to the model with only covariates. For the prediction model (block 2), the deviance is relative to the control model; \* p < .05, \*\* p < .01, \*\*\* p < .001

**Table S3.** Models fit for the prospective analysis of the dependent variable Social impact.

|                                                            | Block 1<br>Control for initial status                                   | Block 2<br>Adding variables of interest                                 |
|------------------------------------------------------------|-------------------------------------------------------------------------|-------------------------------------------------------------------------|
| Predictor                                                  | Social impact T2<br>(N = 111, 74 families)<br><i>Coefficient B [CI]</i> | Social impact T2<br>(N = 111, 74 families)<br><i>Coefficient B [CI]</i> |
| <b>Variables of interest</b>                               |                                                                         |                                                                         |
| Psychological flexibility T1                               | -                                                                       | -.10 [-.19, .001]                                                       |
| Stress communication T1                                    | -                                                                       | .01 [-.40, .43]                                                         |
| Supportive DC T1                                           | -                                                                       | .12 [-.20, .45]                                                         |
| Common DC T1                                               | -                                                                       | .31 [-.15, .77]                                                         |
| Negative DC T1                                             | -                                                                       | -.01 [-.38, .36]                                                        |
| Total network support T1                                   | -                                                                       | -.08 [-.23, .06]                                                        |
| Satisfaction with network support (too few vs. enough) T1  | -                                                                       | 1.05 [-1.05, 3.15]                                                      |
| Satisfaction with network support (too much vs. enough) T1 | -                                                                       | 1.03 [-1.13, 3.19]                                                      |
| <b>Covariates</b>                                          |                                                                         |                                                                         |
| Time since diagnosis                                       | -.06 [-.13, .008]                                                       | -.06 [-.13, .01]                                                        |
| Age ill child                                              | -.07 [-.31, .17]                                                        | -.05 [-.30, .20]                                                        |
| Diagnosis (AML vs. ALL)                                    | 2.03 [-.69, 4.75]                                                       | 2.00 [-.80, 4.80]                                                       |
| Diagnosis (CML vs. ALL)                                    | -5.14 [-12.45, 2.18]                                                    | -6.56 [-14.17, 1.04]                                                    |
| Diagnosis (Non Hodgkin vs. ALL)                            | -.31 [-2.81, 2.20]                                                      | -.63 [-3.19, 1.94]                                                      |
| Sex parent (women vs. men)                                 | .14 [-1.11, 1.38]                                                       | .05 [-1.40, 1.51]                                                       |
| Age parent                                                 | -.005 [-.17, .16]                                                       | -.01 [-.18, .16]                                                        |
| Family status (Divorced vs. Married)                       | 2.15 [-1.29, 5.58]                                                      | 2.40 [-1.20, 6.00]                                                      |
| T2 minus T1                                                | -.05 [-.13, .02]                                                        | -.04 [-.11, .04]                                                        |
| <b>Outcome variables at previous time</b>                  |                                                                         |                                                                         |
| Financial impact T1                                        | -                                                                       |                                                                         |
| General family impact T1                                   | -                                                                       |                                                                         |
| Social impact T1                                           | .41 [.21, .61]***                                                       | .34 [.14, .54]**                                                        |
| Satisfaction with internal family fit T1                   | -                                                                       |                                                                         |
| <b>Δ Deviance<sup>1</sup></b>                              | 15.81***                                                                | 13.84                                                                   |

To note: ALL = Acute lymphoblastic leukemia, AML = Acute myeloid leukemia, CML = Chronic myeloid leukemia; <sup>1</sup>For the control model (block 1), the deviance is relative to the model with only covariates. For the prediction model (block 2), the deviance is relative to the control model; \* p < .05, \*\* p < .01, \*\*\* p < .001

**Table S4.** Models fit for the prospective analysis of the dependent variable Satisfaction with internal family fit.

|                                                            | Block 1<br>Control for initial status                                                           | Block 2<br>Adding variables of interest                                                         |
|------------------------------------------------------------|-------------------------------------------------------------------------------------------------|-------------------------------------------------------------------------------------------------|
| Predictor                                                  | Satisfaction with internal family fit T2<br>(N = 109, 73 families)<br><i>Coefficient B [CI]</i> | Satisfaction with internal family fit T2<br>(N = 109, 73 families)<br><i>Coefficient B [CI]</i> |
| <b>Variables of interest</b>                               |                                                                                                 |                                                                                                 |
| Psychological flexibility T1                               | -                                                                                               | .16 [-.07, .39]                                                                                 |
| Stress communication T1                                    | -                                                                                               | -.15 [-1.08, .79]                                                                               |
| Supportive DC T1                                           | -                                                                                               | -.24 [-1.02, .54]                                                                               |
| Common DC T1                                               | -                                                                                               | .46 [-.59, 1.52]                                                                                |
| Negative DC T1                                             | -                                                                                               | -.39 [-1.25, .48]                                                                               |
| Total network support T1                                   | -                                                                                               | .21 [-.13, .54]                                                                                 |
| Satisfaction with network support (too few vs. enough) T1  | -                                                                                               | -1.38 [-6.10, 3.34]                                                                             |
| Satisfaction with network support (too much vs. enough) T1 | -                                                                                               | .20 [-4.62, 5.02]                                                                               |
| <b>Covariates</b>                                          |                                                                                                 |                                                                                                 |
| Time since diagnosis                                       | .09 [-.06, .25]                                                                                 | .10 [-.06, .25]                                                                                 |
| Age ill child                                              | .37 [-.13, .87]                                                                                 | .22 [-.31, .76]                                                                                 |
| Diagnosis (AML vs. ALL)                                    | 2.55 [-3.37, 8.47]                                                                              | 2.85 [-3.13, 8.82]                                                                              |
| Diagnosis (CML vs. ALL)                                    | 12.64 [-3.51, 28.79]                                                                            | 17.80 [1.11, 34.49]*                                                                            |
| Diagnosis (Non Hodgkin vs. ALL)                            | .39 [-4.98, 5.76]                                                                               | .31 [-5.09, 5.72]                                                                               |
| Sex parent (women vs. men)                                 | .98 [-1.65, 3.61]                                                                               | 2.47 [-.79, 5.73]                                                                               |
| Age parent                                                 | -.35 [-.70, .01]                                                                                | -.24 [-.62, .14]                                                                                |
| Family status (Divorced vs. Married)                       | -6.92 [-15.68, 1.84]                                                                            | -7.43 [-16.45, 1.60]                                                                            |
| T2 minus T1                                                | .06 [-.10, .23]                                                                                 | .08 [-.10, .26]                                                                                 |
| <b>Outcome variables at previous time</b>                  |                                                                                                 |                                                                                                 |
| Financial impact T1                                        | -                                                                                               | -                                                                                               |
| General family impact T1                                   | -                                                                                               | -                                                                                               |
| Social impact T1                                           | -                                                                                               | -                                                                                               |
| Satisfaction with internal family fit T1                   | .50 [.29, .72]***                                                                               | .30 [.01, .59]*                                                                                 |
| <b>Δ Deviance<sup>1</sup></b>                              | 21.25***                                                                                        | 9.75                                                                                            |

*To note:* ALL = Acute lymphoblastic leukemia, AML = Acute myeloid leukemia, CML = Chronic myeloid leukemia; <sup>1</sup>For the control model (block 1), the deviance is relative to the model with only covariates. For the prediction model (block 2), the deviance is relative to the control model; \* p < .05, \*\* p < .01, \*\*\* p < .001
